# Supplementary material for: Postnatal lethality and chondrodysplasia in mice lacking both chondroitin sulfate N-acetylgalactosaminyltransferase-1 and -2
Source: PLoS One. 2017 Dec 29;12(12):e0190333. doi: 10.1371/journal.pone.0190333 (PMC5747463; doi:10.1371/journal.pone.0190333)
Supplement: S1 Table — (XLSX) [file pone.0190333.s004.xlsx]

## Sheet: Sheet1
Supplemental Table 1
Genotypic analysis of offspring from t1 and t2 heterozygous intercrosses
t1+/- x t1+/-	No. of offsprins of the following genotypes
	+/+	+/-	-/-
Male	42	105	36
Female	38	80	43
Total	80	185	79
% of total	23	54	23
t2+/- x t2+/-	No. of offsprins of the following genotypes
	+/+	+/-	-/-
Male	41	82	36
Female	44	90	40
Total	85	172	76
% of total	25	52	23
